# Supplementary material
Source: HighWire-hosted journal article supplement (https://jitc.bmj.com/content/10/6/e004336)
Supplement: inline-supplementary-material-2 [file inline-supplementary-material-2.pdf]

| Test Article | Tissue | Analyte | C <sub>max</sub> (ug/mL) | T <sub>max</sub> (h) | AUC <sub>last</sub> ng*h/mL | CL (mL/h/kg) | T <sub>1/2</sub> (h) |
|--------------|--------|---------|--------------------------|----------------------|-----------------------------|--------------|----------------------|
| TAK-186      | Plasma | Intact  | 52.25                    | 0.083                | 1132.29                     | 2.64         | 21.4                 |
|              |        | Cleaved | 3.80                     | 6                    | 172.16                      | 17.38        | 18.4                 |
|              | Tumor  | Intact  | 0.60                     | 6                    | 35.16                       | 83.44        | 31.4                 |
|              |        | Cleaved | 0.08                     | 72                   | 8.77                        | 321.43       | 34.4                 |
