# Supplementary material
Source: HighWire-hosted journal article supplement (https://jitc.bmj.com/content/10/6/e004336)
Supplement: inline-supplementary-material-7 [file inline-supplementary-material-7.pdf]

| Cell line | Effector Donor | pcTAK-186 EC <sub>50</sub> (pM) |           |
|-----------|----------------|---------------------------------|-----------|
|           |                | CD3+CD25+                       | CD3+CD69+ |
| HT29      | D001004192     | 0.5                             | 0.4       |
|           | D001003791     | 0.4                             | 0.4       |
|           | D001004000     | 0.6                             | 0.3       |
|           | D001004668     | 0.2                             | 0.2       |
|           | D001004712     | 1.7                             | 1.1       |

| Cell line | Effector Donor | pcTAK-186 EC <sub>50</sub> (pM) |           |
|-----------|----------------|---------------------------------|-----------|
|           |                | CD3+CD25+                       | CD3+CD69+ |
| LoVo      | D001004192     | 0.5                             | 0.4       |
|           | D001003791     | 0.4                             | 0.4       |
|           | D001004000     | 0.7                             | 0.2       |
|           | D001004668     | 0.3                             | 0.2       |
|           | D001004712     | 2.2                             | 1.2       |
